# Supplementary material for: Connectomic insight into unique stroke patient recovery after rTMS treatment
Source: Front Neurol. 2023 Jul 6;14:1063408. doi: 10.3389/fneur.2023.1063408 (PMC10359072; doi:10.3389/fneur.2023.1063408)
Supplement: Supplementary file 1 [file Table_1.XLSX]

## Sheet: Sheet1
Number	Brain region	Location	Function
1	L-1	Part of primary sensory area.	Along with area 3b, is involved in processing tactile stimuli. Specifically, area 1 represents the secondary point of activation following the reception of a tactile sensation activating area 3b. Area 1 also functions along with area 2 in receiving information related to bilateral tactile stimulation of the hands
2	L-2	Part of primary sensory area.	Involved in the processing of deep tissue sensations. Additionally, area 2 is activated in bilateral tactile stimulation of the hands.
3	L-3a	Part of primary sensory area.	Along with area 2, is known to receive sensory information from deep body tissues. This area is also involved in the burning, chronic pain sensations that originate from deep somatic tissue. Area 3a is also involved in proprioception
4	L-3b	Part of primary sensory area.	Involved in the sensation of tactile stimuli. Specifically, this area represents the initial regions of activation in tactile stimulation, followed by the activation of area 1. Area 3b also functions in the localization of sensation on the skin and distinguishing the features of that sensation. Additionally, area 3b receives exclusive activation in the reception of nociceptive stimuli.
5	L-4	Part of primary motor cortex.	Known to produce fine motor movements of the distal forearm and fingers. Additionally, it functions in giving a muscle its tone and producing forceful muscle contractions. It is also thought to play a role in visual learning of motor-based skills in the early stages of life.
6	L-6a	Part of the premotor areas.	6a shows greater activation when solving math problems, in social interaction settings, and when performing object feature comparison tasks.
7	L-6d	Part of the premotor areas.	Shows less activation compared to area FEF during gambling tasks, in social interaction settings, and during object feature comparison. Compared to area 6a, area 6d shows less activation in solving math problems and in social interaction settings
8	L-6r	Part of the premotor areas.	Has not been extensively studied. The literature indicates that this area is functionally related to Broca's area in humans, which is a well-known cortical area essential to language processing.
9	L-6v	Part of the premotor areas.	The ventral premotor area is known to be active in the control of hand movements that occur while manipulating objects (eg grasping and lifting objects), and the dorsal premotor area is involved in performing specific motor tasks based on visual cues.
10	L-6ma	Part of the supplementary motor regions areas.	Shows more activation compared to areas 6mp, SFL, or s6-8 when individuals are given a visual instruction cue. Area 6ma also showed greater deactivation compared to area SFL when individuals are told a story. Area 6ma also showed less functional activity compared to area s6-8 when individuals had to match objects based on given verbal categories.
11	L-6mp	Part of the supplementary motor regions areas.	Shows less activation compared to 6ma when an individual was given a visual instruction cue and when moving their feet. Compared to 6d, 6mp shows greater deactivation when listening to a story or solving a math problem. Lastly, compared to area 6a, area 6mp shows less activation in social interaction settings
12	L-scef	Part of medial superior frontal gyrus regions.	Higher order oculomotor center implicated in appraising all possible oculomotor behaviors to direct primary oculomotor centers in goal- directed behavior.
13	L-sfl	Part of the supplementary motor regions.	The left hemisphere shows more activity when listening to stories and when a participant is matching objects based on a verbal cue. Compared to area 8BL, area SFL shows more activation when listening to a story, matching objects based on verbal cues and in social interaction settings. Compared to area s6-8, area SFL shows more activation in the left hemisphere when individuals listen to a story.
14	L-24dd	Part of anterior cingulate regions.	Has been implicated in complex motor planning and regulation of muscles in the lower limb and lower trunk through coordination with the supplemental motor area and connections to the spinal cord.
15	L-24dv	Part of anterior cingulate regions.	Has been implicated in complex motor planning and regulation of muscles in the upper limb and upper trunk muscles through coordination with the supplemental motor area and connections to the spinal cord.
16	R-1	Part of primary sensory area.	Along with area 3b, is involved in processing tactile stimuli. Specifically, area 1 represents the secondary point of activation following the reception of a tactile sensation activating area 3b. Area 1 also functions along with area 2 in receiving information related to bilateral tactile stimulation of the hands
17	R-2	Part of primary sensory area.	Involved in the processing of deep tissue sensations. Additionally, area 2 is activated in bilateral tactile stimulation of the hands.
18	R-3a	Part of primary sensory area.	Along with area 2, is known to receive sensory information from deep body tissues. This area is also involved in the burning, chronic pain sensations that originate from deep somatic tissue. Area 3a is also involved in proprioception
19	R-3b	Part of primary sensory area.	Involved in the sensation of tactile stimuli. Specifically, this area represents the initial regions of activation in tactile stimulation, followed by the activation of area 1. Area 3b also functions in the localization of sensation on the skin and distinguishing the features of that sensation. Additionally, area 3b receives exclusive activation in the reception of nociceptive stimuli.
20	R-4	Part of primary motor cortex.	Known to produce fine motor movements of the distal forearm and fingers. Additionally, it functions in giving a muscle its tone and producing forceful muscle contractions. It is also thought to play a role in visual learning of motor-based skills in the early stages of life.
21	R-6a	Part of the premotor areas.	6a shows greater activation when solving math problems, in social interaction settings, and when performing object feature comparison tasks.
22	R-6d	Part of the premotor areas.	Shows less activation compared to area FEF during gambling tasks, in social interaction settings, and during object feature comparison. Compared to area 6a, area 6d shows less activation in solving math problems and in social interaction settings
23	R-6r	Part of the premotor areas.	Has not been extensively studied. The literature indicates that this area is functionally related to Broca's area in humans, which is a well-known cortical area essential to language processing.
24	R-6v	Part of the premotor areas.	The ventral premotor area is known to be active in the control of hand movements that occur while manipulating objects (eg grasping and lifting objects), and the dorsal premotor area is involved in performing specific motor tasks based on visual cues.
25	R-6ma	Part of the supplementary motor regions areas.	Shows more activation compared to areas 6mp, SFL, or s6-8 when individuals are given a visual instruction cue. Area 6ma also showed greater deactivation compared to area SFL when individuals are told a story. Area 6ma also showed less functional activity compared to area s6-8 when individuals had to match objects based on given verbal categories.
26	R-6mp	Part of the supplementary motor regions areas.	Shows less activation compared to 6ma when an individual was given a visual instruction cue and when moving their feet. Compared to 6d, 6mp shows greater deactivation when listening to a story or solving a math problem. Lastly, compared to area 6a, area 6mp shows less activation in social interaction settings
27	R-scef	Part of medial superior frontal gyrus regions.	Higher order oculomotor center implicated in appraising all possible oculomotor behaviors to direct primary oculomotor centers in goal- directed behavior.
28	R-sfl	Part of the supplementary motor regions.	In the right hemisphere, area SFL is activated insocial interaction settings and is deactivated during object feature comparison tasks.
29	R-24dd	Part of anterior cingulate regions.	Has been implicated in complex motor planning and regulation of muscles in the lower limb and lower trunk through coordination with the supplemental motor area and connections to the spinal cord.
30	R-24dv	Part of anterior cingulate regions.	Has been implicated in complex motor planning and regulation of muscles in the upper limb and upper trunk muscles through coordination with the supplemental motor area and connections to the spinal cord.
31	L-accumbens	Part of the basal ganglia.	Be a key structure involved in mediating motivational and emotional processes, the limbic-motor interface, and the effects of certain psychoactive drugs
32	L-caudate	Part of the basal ganglia.	Process visual information and control movement. It's involved in working memory, cognitive function, and emotions.
33	L-pallidum	Part of the basal ganglia.	Movement control.
34	L-putamen	Part of the basal ganglia.	Learning and motor control, including speech articulation, language functions, reward, cognitive functioning, and addiction.
35	L-thalamus		Relaying information between the cortex and the brain stem
36	L-ventraldc	Hypothalamic fissure	Coordinating with the endocrine system to release hormones, relaying sensory and motor signals to the cerebral cortex, and regulating circadian rhythms
37	L-cerebellum		Coordinate and regulate a wide range of functions and processes
38	R-accumbens	Part of the basal ganglia.	Be a key structure involved in mediating motivational and emotional processes, the limbic-motor interface, and the effects of certain psychoactive drugs
39	R-caudate	Part of the basal ganglia.	Process visual information and control movement. It's involved in working memory, cognitive function, and emotions.
40	R-pallidum	Part of the basal ganglia.	Movement control.
41	R-putamen	Part of the basal ganglia.	Learning and motor control, including speech articulation, language functions, reward, cognitive functioning, and addiction.
42	R-thalamus		Relaying information between the cortex and the brain stem
43	R-ventraldc	Hypothalamic fissure	Coordinating with the endocrine system to release hormones, relaying sensory and motor signals to the cerebral cortex, and regulating circadian rhythms
44	R-cerebellum		Coordinate and regulate a wide range of functions and processes
45	Brainstem		Responsible for many vital functions of life, such as breathing, consciousness, blood pressure, heart rate, and sleep, as well as many important brainstem nuclei
